# Supplementary material for: Fine and hyperfine coupling constants of the cis-β-cyanovinyl radical, HCCHCN
Source: Royal Society of Chemistry journal article supplement (doi:10.1039/d2cp00516f), 2022-01-01
Supplement: d2cp00516f1.pdf [file d2cp00516f1.pdf]

Electronic Supplementary Information (ESI):

## Fine and hyperfine coupling constants of the cis- $\beta$ -cyanovinyl radical, HCCHCN

Masakazu Nakajima,<sup>a</sup> Yi-Ting Liu,<sup>b</sup> Ching Hua Chang,<sup>b</sup> Kenji Seiki,<sup>a</sup> Yoshihiro Sumiyoshi,<sup>c</sup> Yasuhiro Ohshima,<sup>d</sup> Jian Tang<sup>e</sup> and Yasuki Endo<sup>b\*</sup>

List of contents:

Table S-1: Observed line frequencies of the cis- $\beta$ -cyanovinyl radical and their assignments

---

<sup>a</sup> Department of Basic Science, The University of Tokyo, 3-8-1 Komaba, Meguro-ku, Tokyo 153-8902, Japan.

<sup>b</sup> Department of Applied Chemistry, National Yang Ming Chiao Tung University, 1001 Ta-Hsueh Rd., Hsinchu 300098, Taiwan.

<sup>c</sup> Division of Pure and Applied Science, Graduate School of Science and Technology, Gunma University, 4-2 Aramaki, Maebashi, Gunma 371-8510, Japan.

<sup>d</sup> Department of Chemistry, School of Science, Tokyo Institute of Technology, Ookayama 2-12-1, Meguro, Tokyo 152-8550, Japan.

<sup>e</sup> Graduate School of Natural Science and Technology, Okayama University, 3-1-1 Tsushima-Naka, Okayama 700-8530, Japan.

\* E-mail: endo@nycu.edu.tw



Table S-I (continue)

| $N'$ | $K'_a$ | $K'_c$ | $J'$         | $F'_1$ | $F'_2$     | $F'$       | $N''$ | $K''_a$ | $K''_c$ | $J''$        | $F''_1$ | $F''_2$    | $F''$      | Obs. <sup>b</sup>      | o.-c. <sup>c</sup> |
|------|--------|--------|--------------|--------|------------|------------|-------|---------|---------|--------------|---------|------------|------------|------------------------|--------------------|
| 1    | 0      | 1      | 0.5<br>(0.5) | 1<br>0 | 0.5<br>0.5 | 0.5<br>0.5 | 0     | 0       | 0       | 0.5          | 1       | 1.5        | 1.5        | 10199.084              | -6                 |
|      |        |        | 0.5<br>(0.5) | 1<br>0 | 0.5<br>0.5 | 0.5<br>0.5 |       |         |         | 0.5          | 1       | 1.5        | 0.5        | 10199.224              | 7                  |
|      |        |        | 0.5<br>(0.5) | 1<br>0 | 0.5<br>0.5 | 1.5<br>1.5 |       |         |         | 0.5          | 1       | 1.5        | 2.5        | 10199.309              | -2                 |
|      |        |        | 0.5<br>(0.5) | 1<br>0 | 0.5<br>0.5 | 1.5<br>1.5 |       |         |         | 0.5          | 1       | 1.5        | 0.5        | 10199.647              | -2                 |
| 2    | 1      | 2      | 2.5<br>(1.5) | 2<br>2 | 2.5<br>2.5 | 3.5<br>3.5 | 1     | 1       | 1       | 1.5<br>(0.5) | 1<br>1  | 1.5<br>1.5 | 2.5<br>2.5 | 19859.356              | 2                  |
|      |        |        | 2.5          | 3      | 3.5        | 3.5        |       |         |         | 1.5          | 2       | 2.5        | 2.5        | 19859.948              | 1                  |
|      |        |        | 2.5          | 3      | 3.5        | 4.5        |       |         |         | 1.5          | 2       | 2.5        | 3.5        | 19860.552              | 4                  |
|      |        |        | 2.5          | 3      | 3.5        | 2.5        |       |         |         | 1.5          | 2       | 2.5        | 1.5        | 19861.398 <sup>d</sup> | 8                  |
|      |        |        | 1.5<br>(2.5) | 2<br>2 | 2.5<br>2.5 | 3.5<br>3.5 |       |         |         | 0.5<br>(1.5) | 1<br>1  | 1.5<br>1.5 | 2.5<br>2.5 | 19861.398 <sup>d</sup> | 4                  |
|      |        |        | 2.5          | 3      | 2.5        | 2.5        |       |         |         | 1.5          | 2       | 1.5        | 1.5        | 19861.732              | -2                 |
|      |        |        | 2.5          | 3      | 2.5        | 3.5        |       |         |         | 1.5          | 2       | 1.5        | 2.5        | 19862.665              | 0                  |
| 2    | 0      | 2      | 2.5          | 3      | 3.5        | 2.5        | 1     | 0       | 1       | 0.5<br>(0.5) | 1<br>0  | 0.5<br>0.5 | 1.5<br>1.5 | 20386.637              | -1                 |
|      |        |        | 2.5<br>(1.5) | 2<br>2 | 2.5<br>2.5 | 1.5<br>1.5 |       |         |         | 1.5<br>(0.5) | 2<br>1  | 2.5<br>1.5 | 1.5<br>1.5 | 20386.883 <sup>d</sup> | 4                  |
|      |        |        | 1.5<br>(1.5) | 2<br>1 | 1.5<br>1.5 | 0.5<br>0.5 |       |         |         | 0.5<br>(0.5) | 1<br>0  | 0.5<br>0.5 | 0.5<br>0.5 | 20386.883 <sup>d</sup> | 0                  |
|      |        |        | 2.5<br>(2.5) | 3<br>2 | 2.5<br>2.5 | 1.5<br>1.5 |       |         |         | 0.5<br>(0.5) | 0<br>1  | 0.5<br>0.5 | 1.5<br>1.5 | 20387.021              | -1                 |
|      |        |        | 2.5<br>(2.5) | 3<br>2 | 2.5<br>2.5 | 2.5<br>2.5 |       |         |         | 1.5<br>(1.5) | 2<br>1  | 1.5<br>1.5 | 2.5<br>2.5 | 20387.315              | -2                 |
|      |        |        | 2.5          | 3      | 3.5        | 3.5        |       |         |         | 1.5          | 2       | 2.5        | 3.5        | 20387.375              | -5                 |
|      |        |        | 1.5<br>(1.5) | 2<br>1 | 1.5<br>1.5 | 1.5<br>1.5 |       |         |         | 0.5<br>(0.5) | 1<br>0  | 0.5<br>0.5 | 1.5<br>1.5 | 20387.487              | -2                 |
|      |        |        | 1.5<br>(1.5) | 2<br>1 | 1.5<br>1.5 | 2.5<br>2.5 |       |         |         | 0.5<br>(0.5) | 1<br>0  | 0.5<br>0.5 | 1.5<br>1.5 | 20387.618              | 3                  |
|      |        |        | 2.5          | 2      | 1.5        | 0.5        |       |         |         | 0.5<br>(1.5) | 1<br>2  | 1.5<br>1.5 | 0.5<br>0.5 | 20387.668 <sup>d</sup> | 3                  |
|      |        |        | 1.5<br>(2.5) | 2<br>3 | 2.5<br>2.5 | 2.5<br>2.5 |       |         |         | 0.5<br>(1.5) | 1<br>2  | 1.5<br>1.5 | 2.5<br>2.5 | 20387.668 <sup>d</sup> | -4                 |
|      |        |        | 1.5<br>(1.5) | 1<br>2 | 1.5<br>1.5 | 1.5<br>1.5 |       |         |         | 0.5<br>(1.5) | 0<br>1  | 0.5<br>1.5 | 0.5<br>0.5 | 20387.935              | 6                  |

Table S-I (continue)

| $N'$ | $K'_a$ | $K'_c$ | $J'$         | $F'_1$ | $F'_2$     | $F'$        | $N''$ | $K''_a$ | $K''_c$ | $J''$        | $F''_1$ | $F''_2$    | $F''$       | Obs. <sup>b</sup>      | o.-c. <sup>c</sup> |
|------|--------|--------|--------------|--------|------------|-------------|-------|---------|---------|--------------|---------|------------|-------------|------------------------|--------------------|
| 2    | 0      | 2      | 1.5<br>(2.5) | 2<br>3 | 2.5<br>2.5 | 1.5<br>1.5) | 1     | 0       | 1       | 0.5<br>(1.5) | 1<br>2  | 1.5<br>1.5 | 0.5<br>0.5) | 20387.982              | -3                 |
|      |        |        | 2.5<br>(2.5) | 3<br>2 | 2.5<br>2.5 | 2.5<br>2.5) |       |         |         | 1.5<br>(1.5) | 2<br>1  | 1.5<br>1.5 | 1.5<br>1.5) | 20388.277              | 4                  |
|      |        |        | 2.5          | 3      | 3.5        | 3.5         |       |         |         | 1.5          | 2       | 2.5        | 2.5         | 20388.294              | 1                  |
|      |        |        | 2.5          | 3      | 3.5        | 4.5         |       |         |         | 1.5          | 2       | 2.5        | 3.5         | 20388.380              | 1                  |
|      |        |        | 2.5<br>(2.5) | 3<br>2 | 2.5<br>2.5 | 3.5<br>3.5) |       |         |         | 1.5<br>(1.5) | 2<br>1  | 1.5<br>1.5 | 2.5<br>2.5) | 20388.395 <sup>d</sup> | 4                  |
|      |        |        | 2.5          | 3      | 3.5        | 2.5         |       |         |         | 1.5<br>(0.5) | 2<br>1  | 2.5<br>1.5 | 1.5<br>1.5) | 20388.395 <sup>d</sup> | 0                  |
|      |        |        | 2.5<br>(1.5) | 2<br>2 | 2.5<br>2.5 | 2.5<br>2.5) |       |         |         | 1.5<br>(1.5) | 1<br>2  | 1.5<br>2.5 | 1.5<br>1.5) | 20388.571              | 0                  |
|      |        |        | 2.5          | 2      | 1.5        | 1.5         |       |         |         | 1.5          | 1       | 0.5        | 0.5         | 20388.616              | 2                  |
|      |        |        | 2.5          | 2      | 1.5        | 1.5         |       |         |         | 0.5<br>(1.5) | 1<br>2  | 1.5<br>1.5 | 1.5<br>1.5) | 20388.651              | -2                 |
|      |        |        | 2.5<br>(1.5) | 2<br>2 | 2.5<br>2.5 | 3.5<br>3.5) |       |         |         | 1.5          | 2       | 2.5        | 3.5         | 20388.651              | -3                 |
|      |        |        | 1.5<br>(1.5) | 1<br>2 | 1.5<br>1.5 | 0.5<br>0.5) |       |         |         | 0.5<br>(1.5) | 0<br>1  | 0.5<br>1.5 | 0.5<br>0.5) | 20388.782 <sup>d</sup> | 8                  |
|      |        |        | 2.5          | 2      | 1.5        | 2.5         |       |         |         | 1.5          | 1       | 0.5        | 1.5         | 20388.782 <sup>d</sup> | 2                  |
|      |        |        | 2.5<br>(1.5) | 2<br>2 | 2.5<br>2.5 | 3.5<br>3.5) |       |         |         | 1.5<br>(0.5) | 1<br>1  | 1.5<br>1.5 | 2.5<br>2.5) | 20388.897              | 1                  |
|      |        |        | 1.5<br>(2.5) | 2<br>3 | 2.5<br>2.5 | 2.5<br>2.5) |       |         |         | 0.5<br>(1.5) | 1<br>2  | 1.5<br>1.5 | 1.5<br>1.5) | 20388.921              | 1                  |
|      |        |        | 1.5<br>(2.5) | 2<br>3 | 2.5<br>2.5 | 3.5<br>3.5) |       |         |         | 0.5<br>(1.5) | 1<br>2  | 1.5<br>1.5 | 2.5<br>2.5) | 20388.986              | 0                  |
|      |        |        | 2.5<br>(2.5) | 3<br>2 | 2.5<br>2.5 | 1.5<br>1.5) |       |         |         | 1.5<br>(0.5) | 2<br>1  | 1.5<br>0.5 | 0.5<br>0.5) | 20389.260              | -1                 |
|      |        |        | 1.5<br>(1.5) | 1<br>2 | 1.5<br>1.5 | 2.5<br>2.5) |       |         |         | 0.5<br>(0.5) | 0<br>1  | 0.5<br>0.5 | 1.5<br>1.5) | 20389.451              | 1                  |
|      |        |        | 1.5          | 1      | 0.5        | 1.5         |       |         |         | 0.5<br>(0.5) | 1<br>0  | 0.5<br>0.5 | 0.5<br>0.5) | 20389.516              | -2                 |
|      |        |        | 2.5<br>(1.5) | 2<br>2 | 2.5<br>2.5 | 1.5<br>1.5) |       |         |         | 1.5<br>(0.5) | 1<br>1  | 1.5<br>1.5 | 0.5<br>0.5) | 20389.748              | 0                  |
|      |        |        | 2.5          | 3      | 3.5        | 2.5         |       |         |         | 1.5          | 2       | 2.5        | 2.5         | 20390.225              | -1                 |
|      |        |        | 1.5<br>(1.5) | 2<br>1 | 1.5<br>1.5 | 2.5<br>2.5) |       |         |         | 1.5<br>(0.5) | 1<br>1  | 1.5<br>1.5 | 2.5<br>2.5) | 20390.529              | -3                 |

Table S-I (continue)

| $N'$ | $K'_a$ | $K'_c$ | $J'$ | $F'_1$ | $F'_2$ | $F'$ | $N''$ | $K''_a$                | $K''_c$ | $J''$ | $F''_1$ | $F''_2$ | $F''$ | Obs. <sup>b</sup>      | o.-c. <sup>c</sup> |                        |     |
|------|--------|--------|------|--------|--------|------|-------|------------------------|---------|-------|---------|---------|-------|------------------------|--------------------|------------------------|-----|
| 2    | 0      | 2      | 1.5  | 2      | 2.5    | 1.5  | 1     | 0                      | 1       | 0.5   | 1       | 1.5     | 1.5   | 20390.830 <sup>d</sup> | -2                 |                        |     |
|      |        |        | (2.5 | 3      | 2.5    | 1.5) |       |                        |         | (1.5  | 2       | 1.5     | 1.5)  |                        |                    |                        |     |
|      |        |        | 1.5  | 1      | 0.5    | 1.5  |       |                        |         | 1.5   | 2       | 2.5     | 1.5   |                        |                    | 20390.830 <sup>d</sup> | -12 |
|      |        |        | (0.5 | 1      | 1.5    | 1.5) |       |                        |         |       |         |         |       |                        |                    |                        |     |
|      |        |        | 1.5  | 1      | 1.5    | 1.5  |       |                        |         | 1.5   | 2       | 1.5     | 1.5   |                        |                    | 20391.025              | -1  |
|      |        |        | (1.5 | 2      | 1.5    | 1.5) |       |                        |         | (1.5  | 1       | 1.5     | 1.5)  |                        |                    |                        |     |
|      |        |        | 1.5  | 2      | 1.5    | 0.5  |       |                        |         | 0.5   | 1       | 1.5     | 0.5   |                        |                    | 20391.077 <sup>d</sup> | 1   |
| (1.5 | 1      | 1.5    | 0.5) | (0.5   | 1      | 1.5  | 0.5)  |                        |         |       |         |         |       |                        |                    |                        |     |
| 1.5  | 2      | 1.5    | 1.5  | 1.5    | 2      | 2.5  | 2.5   | 20391.077 <sup>d</sup> | 0       |       |         |         |       |                        |                    |                        |     |
| (1.5 | 1      | 1.5    | 1.5) |        |        |      |       |                        |         |       |         |         |       |                        |                    |                        |     |
| 1.5  | 2      | 1.5    | 1.5  | 1.5    | 1      | 1.5  | 1.5   | 20391.439              | -2      |       |         |         |       |                        |                    |                        |     |
| (1.5 | 1      | 1.5    | 1.5) | (1.5   | 2      | 2.5  | 1.5)  |                        |         |       |         |         |       |                        |                    |                        |     |
| 3    | 0      | 3      | 3.5  | 4      | 3.5    | 2.5  | 2     | 0                      | 2       | 1.5   | 1       | 1.5     | 1.5   | 30569.247              | 2                  |                        |     |
|      |        |        | (3.5 | 3      | 3.5    | 2.5) |       |                        |         | (1.5  | 2       | 1.5     | 1.5)  |                        |                    |                        |     |
|      |        |        | 3.5  | 4      | 4.5    | 4.5  |       |                        |         | 2.5   | 3       | 3.5     | 4.5   |                        |                    | 30569.498              | -7  |
|      |        |        | 3.5  | 4      | 3.5    | 3.5  |       |                        |         | 2.5   | 3       | 2.5     | 3.5   |                        |                    | 30569.534              | -3  |
|      |        |        | (3.5 | 3      | 3.5    | 3.5) |       |                        |         | (2.5  | 2       | 2.5     | 3.5)  |                        |                    |                        |     |
|      |        |        | 2.5  | 3      | 3.5    | 3.5  |       |                        |         | 1.5   | 2       | 2.5     | 3.5   |                        |                    | 30569.911              | -5  |
|      |        |        | (2.5 | 3      | 2.5    | 3.5) |       |                        |         |       |         |         |       |                        |                    |                        |     |
|      |        |        | 3.5  | 4      | 4.5    | 4.5  |       |                        |         | 2.5   | 3       | 3.5     | 3.5   |                        |                    | 30570.506              | 3   |
|      |        |        | 3.5  | 4      | 4.5    | 5.5  |       |                        |         | 2.5   | 3       | 3.5     | 4.5   |                        |                    | 30570.566              | 3   |
|      |        |        | 3.5  | 4      | 4.5    | 3.5  |       |                        |         | 2.5   | 3       | 3.5     | 2.5   |                        |                    | 30570.571              | 0   |
|      |        |        | 3.5  | 4      | 3.5    | 3.5  |       |                        |         | 2.5   | 3       | 2.5     | 2.5   |                        |                    | 30570.612              | 1   |
|      |        |        | (3.5 | 3      | 3.5    | 3.5) |       |                        |         | (2.5  | 2       | 2.5     | 2.5)  |                        |                    |                        |     |
|      |        |        | 3.5  | 4      | 3.5    | 4.5  |       |                        |         | 2.5   | 3       | 2.5     | 3.5   |                        |                    | 30570.663              | 3   |
|      |        |        | (3.5 | 3      | 3.5    | 4.5) |       |                        |         | (2.5  | 2       | 2.5     | 3.5)  |                        |                    |                        |     |
|      |        |        | 3.5  | 3      | 2.5    | 1.5  |       |                        |         | 2.5   | 2       | 1.5     | 0.5   |                        |                    | 30570.826              | -1  |
|      |        |        | 2.5  | 3      | 2.5    | 2.5  |       |                        |         | 1.5   | 2       | 1.5     | 1.5   |                        |                    | 30570.873              | 5   |
|      |        |        | (2.5 | 2      | 2.5    | 2.5) |       |                        |         | (1.5  | 1       | 1.5     | 1.5)  |                        |                    |                        |     |
| 3.5  | 4      | 3.5    | 2.5  | 2.5    | 3      | 2.5  | 1.5   | 30570.974              | -2      |       |         |         |       |                        |                    |                        |     |
| (3.5 | 3      | 3.5    | 2.5) | (2.5   | 2      | 2.5  | 1.5)  |                        |         |       |         |         |       |                        |                    |                        |     |
| 3.5  | 3      | 2.5    | 2.5  | 2.5    | 2      | 1.5  | 1.5   | 30570.994              | 1       |       |         |         |       |                        |                    |                        |     |
| 3.5  | 3      | 3.5    | 3.5  | 2.5    | 2      | 2.5  | 2.5   | 30571.011              | 4       |       |         |         |       |                        |                    |                        |     |
| (3.5 | 4      | 3.5    | 3.5) | (1.5   | 2      | 2.5  | 2.5)  |                        |         |       |         |         |       |                        |                    |                        |     |
| 2.5  | 3      | 3.5    | 2.5  | 1.5    | 2      | 2.5  | 1.5   | 30571.055              | -5      |       |         |         |       |                        |                    |                        |     |
| (2.5 | 3      | 2.5    | 1.5) |        |        |      |       |                        |         |       |         |         |       |                        |                    |                        |     |
| 3.5  | 3      | 2.5    | 3.5  | 2.5    | 2      | 1.5  | 2.5   | 30571.073              | 1       |       |         |         |       |                        |                    |                        |     |

Table S-I (continue)

| $N'$ | $K'_a$ | $K'_c$ | $J'$         | $F'_1$ | $F'_2$     | $F'$        | $N''$ | $K''_a$ | $K''_c$ | $J''$        | $F''_1$ | $F''_2$    | $F''$       | Obs. <sup>b</sup>      | o.-c. <sup>c</sup> |
|------|--------|--------|--------------|--------|------------|-------------|-------|---------|---------|--------------|---------|------------|-------------|------------------------|--------------------|
| 3    | 0      | 3      | 3.5<br>(3.5) | 3<br>4 | 3.5<br>3.5 | 4.5<br>4.5) | 2     | 0       | 2       | 2.5<br>(1.5) | 2<br>2  | 2.5<br>2.5 | 3.5<br>3.5) | 30571.214              | 1                  |
|      |        |        | 2.5          | 3      | 3.5        | 3.5         |       |         |         | 1.5<br>(2.5) | 2<br>3  | 2.5<br>2.5 | 2.5         | 30571.231              | 1                  |
|      |        |        | 2.5<br>(2.5) | 3<br>2 | 2.5<br>2.5 | 3.5<br>3.5) |       |         |         | 1.5<br>(1.5) | 2<br>1  | 1.5<br>1.5 | 2.5<br>2.5) | 30571.277 <sup>d</sup> | 8                  |
|      |        |        | 2.5          | 3      | 3.5        | 4.5         |       |         |         | 1.5<br>(2.5) | 2<br>3  | 2.5<br>2.5 | 3.5<br>3.5) | 30571.277 <sup>d</sup> | -1                 |
|      |        |        | 3.5<br>(3.5) | 3<br>4 | 3.5<br>3.5 | 2.5<br>2.5) |       |         |         | 2.5<br>(1.5) | 2<br>2  | 2.5<br>2.5 | 1.5<br>1.5) | 30571.442              | 2                  |
|      |        |        | 3.5<br>(3.5) | 3<br>4 | 3.5<br>3.5 | 4.5<br>4.5) |       |         |         | 2.5          | 3       | 3.5        | 4.5         | 30571.482              | -4                 |
|      |        |        | 2.5          | 2      | 1.5        | 2.5         |       |         |         | 1.5          | 1       | 0.5        | 1.5         | 30571.548 <sup>d</sup> | 1                  |
|      |        |        | 2.5<br>(2.5) | 2<br>3 | 2.5<br>2.5 | 1.5<br>1.5) |       |         |         | 1.5<br>(1.5) | 1<br>2  | 1.5<br>1.5 | 0.5<br>0.5) | 30571.548 <sup>d</sup> | -12                |
|      |        |        | 2.5<br>(2.5) | 2<br>3 | 2.5<br>2.5 | 3.5<br>3.5) |       |         |         | 1.5<br>(1.5) | 1<br>2  | 1.5<br>1.5 | 2.5<br>2.5) | 30571.736              | 2                  |
|      |        |        | 2.5          | 2      | 1.5        | 1.5         |       |         |         | 1.5<br>(1.5) | 2<br>1  | 1.5<br>1.5 | 1.5<br>1.5) | 30572.424              | 3                  |
|      |        |        | 3.5          | 4      | 4.5        | 3.5         |       |         |         | 2.5          | 3       | 3.5        | 3.5         | 30572.501              | -2                 |
|      |        |        | 3.5          | 3      | 2.5        | 1.5         |       |         |         | 2.5          | 2       | 1.5        | 1.5         | 30572.686              | -2                 |
|      |        |        | 2.5<br>(2.5) | 3<br>2 | 2.5<br>2.5 | 3.5<br>3.5) |       |         |         | 2.5<br>(1.5) | 2<br>2  | 2.5<br>2.5 | 3.5<br>3.5) | 30572.906              | 0                  |
|      |        |        | 2.5          | 3      | 3.5        | 2.5         |       |         |         | 1.5<br>(2.5) | 2<br>3  | 2.5<br>2.5 | 2.5<br>2.5) | 30572.968 <sup>d</sup> | -6                 |
|      |        |        | 2.5<br>(2.5) | 2<br>3 | 2.5<br>2.5 | 2.5<br>2.5) |       |         |         | 2.5<br>(2.5) | 3<br>2  | 2.5<br>2.5 | 1.5<br>1.5) | 30572.968 <sup>d</sup> | -12                |
|      |        |        | 2.5          | 2      | 1.5        | 2.5         |       |         |         | 1.5<br>(1.5) | 2<br>1  | 1.5<br>1.5 | 2.5<br>2.5) | 30573.022              | 3                  |
|      |        |        | 2.5<br>(2.5) | 3<br>2 | 2.5<br>2.5 | 2.5<br>2.5) |       |         |         | 2.5<br>(1.5) | 2<br>2  | 2.5<br>2.5 | 2.5<br>2.5) | 30573.739              | 2                  |
|      |        |        | 2.5<br>(2.5) | 2<br>3 | 2.5<br>2.5 | 2.5<br>2.5) |       |         |         | 2.5<br>(2.5) | 3<br>2  | 2.5<br>2.5 | 2.5<br>2.5) | 30574.000              | -2                 |
|      |        |        | 2.5<br>(2.5) | 2<br>3 | 2.5<br>2.5 | 3.5<br>3.5) |       |         |         | 2.5<br>2.5   | 3<br>2  | 2.5<br>2.5 | 3.5<br>3.5) | 30574.121              | 11                 |
| 1    | 1      | 0      | 1.5<br>(0.5) | 1<br>1 | 1.5<br>1.5 | 2.5<br>2.5) | 1     | 0       | 1       | 1.5          | 2       | 2.5        | 3.5         | 44915.255 <sup>e</sup> | 0                  |

Table S-I (continue)

| $N'$ | $K'_a$ | $K'_c$ | $J'$ | $F'_1$ | $F'_2$ | $F'$ | $N''$ | $K''_a$ | $K''_c$ | $J''$ | $F''_1$ | $F''_2$ | $F''$ | Obs. <sup>b</sup>      | o.-c. <sup>c</sup> |
|------|--------|--------|------|--------|--------|------|-------|---------|---------|-------|---------|---------|-------|------------------------|--------------------|
| 1    | 1      | 0      | 1.5  | 1      | 0.5    | 1.5  | 1     | 0       | 1       | 0.5   | 1       | 1.5     | 2.5   | 44921.480 <sup>f</sup> | 1                  |
|      |        |        |      |        |        |      |       |         |         | (1.5  | 2       | 1.5     | 2.5)  |                        |                    |
|      |        |        | 0.5  | 1      | 1.5    | 2.5  |       |         |         | 0.5   | 1       | 1.5     | 2.5   | 44922.234 <sup>f</sup> | -15                |
|      |        |        | (1.5 | 2      | 1.5    | 2.5) |       |         |         | (1.5  | 2       | 1.5     | 2.5)  |                        |                    |
|      |        |        | 0.5  | 1      | 1.5    | 1.5  |       |         |         | 0.5   | 1       | 1.5     | 2.5   | 44922.928 <sup>f</sup> | -6                 |
|      |        |        | (1.5 | 2      | 1.5    | 1.5) |       |         |         | (1.5  | 2       | 1.5     | 2.5)  |                        |                    |
|      |        |        | 1.5  | 2      | 2.5    | 3.5  |       |         |         | 1.5   | 2       | 2.5     | 3.5   | 44924.270 <sup>e</sup> | -6                 |
| 1    | 1      | 1      | 1.5  | 2      | 2.5    | 3.5  | 0     | 0       | 0       | 0.5   | 1       | 1.5     | 2.5   | 54582.164 <sup>g</sup> | 5                  |
|      |        |        | 1.5  | 2      | 2.5    | 2.5  |       |         |         | 0.5   | 1       | 1.5     | 2.5   | 54582.577 <sup>g</sup> | 2                  |
|      |        |        | 1.5  | 1      | 0.5    | 1.5  |       |         |         | 0.5   | 1       | 0.5     | 1.5   | 54585.924 <sup>h</sup> | 2                  |
|      |        |        | 1.5  | 1      | 0.5    | 0.5  |       |         |         | 0.5   | 1       | 0.5     | 1.5   | 54586.001 <sup>h</sup> | 8                  |
|      |        |        | 0.5  | 1      | 0.5    | 1.5  |       |         |         | 0.5   | 1       | 1.5     | 2.5   | 54586.238 <sup>g</sup> | 0                  |
|      |        |        | 1.5  | 2      | 1.5    | 2.5  |       |         |         | 0.5   | 1       | 0.5     | 1.5   | 54587.624 <sup>f</sup> | -8                 |
|      |        |        | 1.5  | 2      | 1.5    | 1.5  |       |         |         | 0.5   | 1       | 0.5     | 1.5   | 54588.094 <sup>f</sup> | 8                  |
|      |        |        | 1.5  | 1      | 1.5    | 2.5  |       |         |         | 0.5   | 1       | 1.5     | 2.5   | 54599.455 <sup>g</sup> | 17                 |
| 2    | 1      | 2      | 2.5  | 3      | 3.5    | 4.5  | 1     | 0       | 1       | 1.5   | 2       | 2.5     | 3.5   | 64246.102 <sup>e</sup> | 32                 |
|      |        |        | 2.5  | 3      | 3.5    | 3.5  |       |         |         | 1.5   | 2       | 2.5     | 2.5   | 64246.808 <sup>i</sup> | 9                  |
|      |        |        | 2.5  | 2      | 2.5    | 3.5  |       |         |         | 1.5   | 2       | 2.5     | 3.5   | 64262.136 <sup>e</sup> | -19                |
|      |        |        | (1.5 | 2      | 2.5    | 3.5) |       |         |         |       |         |         |       |                        |                    |
| 3    | 1      | 3      | 3.5  | 4      | 4.5    | 5.5  | 2     | 0       | 2       | 2.5   | 3       | 3.5     | 4.5   | 73646.245 <sup>e</sup> | -24                |
|      |        |        | 3.5  | 4      | 4.5    | 4.5  |       |         |         | 2.5   | 3       | 3.5     | 3.5   | 73646.836 <sup>i</sup> | -28                |

<sup>a</sup> Quantum numbers labeling each line are defined by the coupling scheme,  $\mathbf{J} = \mathbf{N} + \mathbf{S}$ ,  $\mathbf{F}_1 = \mathbf{J} + \mathbf{I}(\text{H}_\alpha)$ ,  $\mathbf{F}_2 = \mathbf{F}_1 + \mathbf{I}(\text{H}_\beta)$ , and  $\mathbf{F} = \mathbf{F}_2 + \mathbf{I}(\text{N})$ .  $\mathbf{N}$  and  $\mathbf{S}$  denote the rotational and electron-spin angular momenta, respectively,  $\mathbf{I}$  the nuclear spin angular momentum of each nucleus, and  $\mathbf{F}$  the total angular momentum of the system. The quantum number label of eigenstate in the spfit/spcat program is given in parenthesis if the label is different from that in our fitting program.

<sup>b</sup> Observed line frequencies in MHz. Lines without superscript letter were observed by FTMW spectroscopy, and the weight of 1.0 is given in the least-squares analysis.

<sup>c</sup> The residuals in the least-squares fit in kHz.

<sup>d</sup> Observed by FTMW spectroscopy. The weight of 0.5 is given in the least-squares analysis, because of overlapping with other line.

<sup>e</sup> Observed by double-resonance spectroscopy with monitoring the 20388.380 MHz line. The weight of 0.1 is given in the least-squares analysis.

<sup>f</sup> Observed by double-resonance spectroscopy with monitoring the 10197.112 MHz line. The weight of 0.1 is given in the least-squares analysis.

<sup>g</sup> Observed by double-resonance spectroscopy with monitoring the 10196.638 MHz line. The weight

of 0.1 is given in the least-squares analysis.

<sup>h</sup> Observed by double-resonance spectroscopy with monitoring the 10197.112 MHz line. The weight of 0.05 is given in the least-squares analysis.

<sup>i</sup> Observed by double-resonance spectroscopy with monitoring the 20388.294 MHz line. The weight of 0.1 is given in the least-squares analysis.
